# Supplementary material for: In Silico Design, Synthesis, and Biological Evaluation of Anticancer Arylsulfonamide Endowed with Anti-Telomerase Activity
Source: MDPI journal article supplement (doi:10.3390/ph15010082), 2022-01-10

# **In Silico Design, Synthesis and Biological Evaluation of Anticancer Arylsulfonamide Endowed with Anti-Telomerase Activity**

**Giulia Culetta <sup>1,2</sup>, Mario Allegra <sup>2</sup>, Anna Maria Almerico <sup>2</sup>, Ignazio Restivo <sup>2</sup> and Marco Tutone <sup>2,\*</sup>**

<sup>1</sup> Dipartimento di Scienze Chimiche, Biologiche, Farmaceutiche e Ambientali, Università di Messina, 98166 Messina, Italy; giulia.culetta@unime.it

<sup>2</sup> Dipartimento di Scienze e Tecnologie Biologiche Chimiche e Farmaceutiche, Università degli Studi di Palermo, 90123 Palermo, Italy; mario.allegra@unipa.it (M.A.); annamaria.almerico@unipa.it (A.M.A.); ignazio.restivo@unipa.it (I.R.)

\* Correspondence: marco.tutone@unipa.it

## **$^1\text{H}$ and $^{13}\text{C}$ NMR spectra of new derivatives synthesized and tested in this work**

NMR spectra of derivative N-(2,5-Dimethoxybenzyl)-4-methylbenzenesulfonamide (1F)

$^1\text{H}$

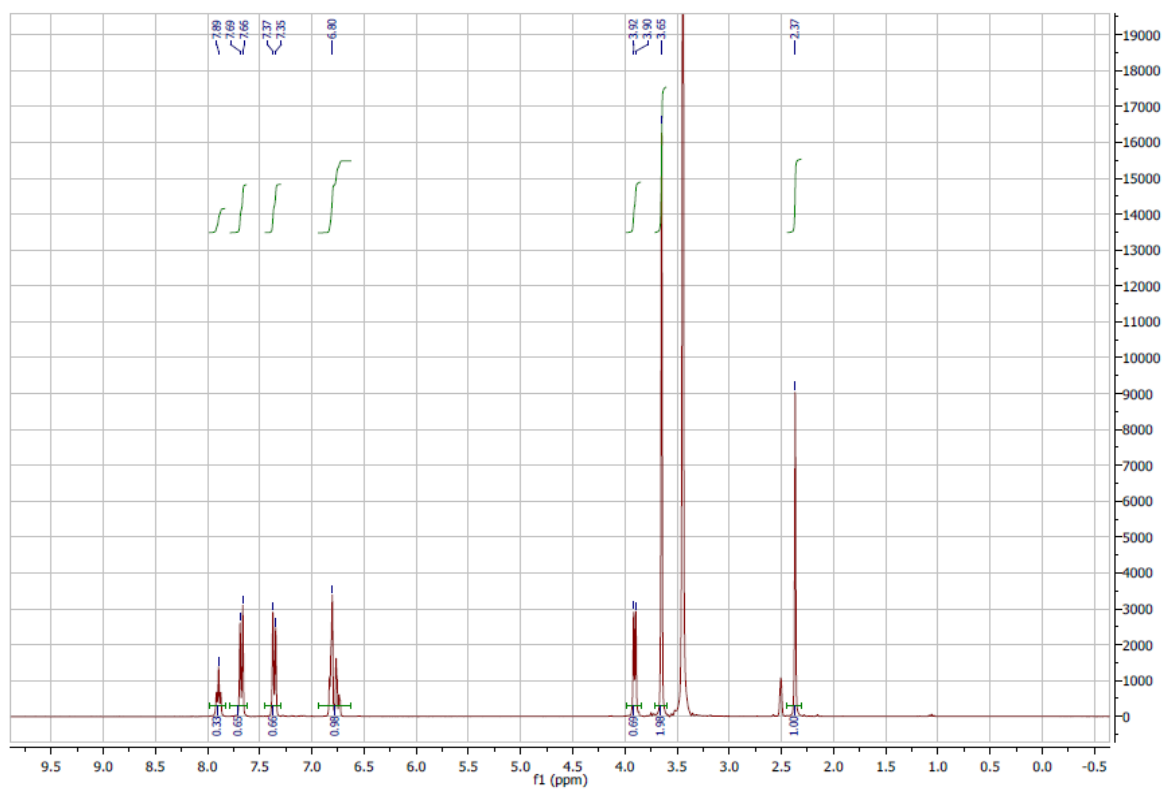

$^{13}\text{C}$

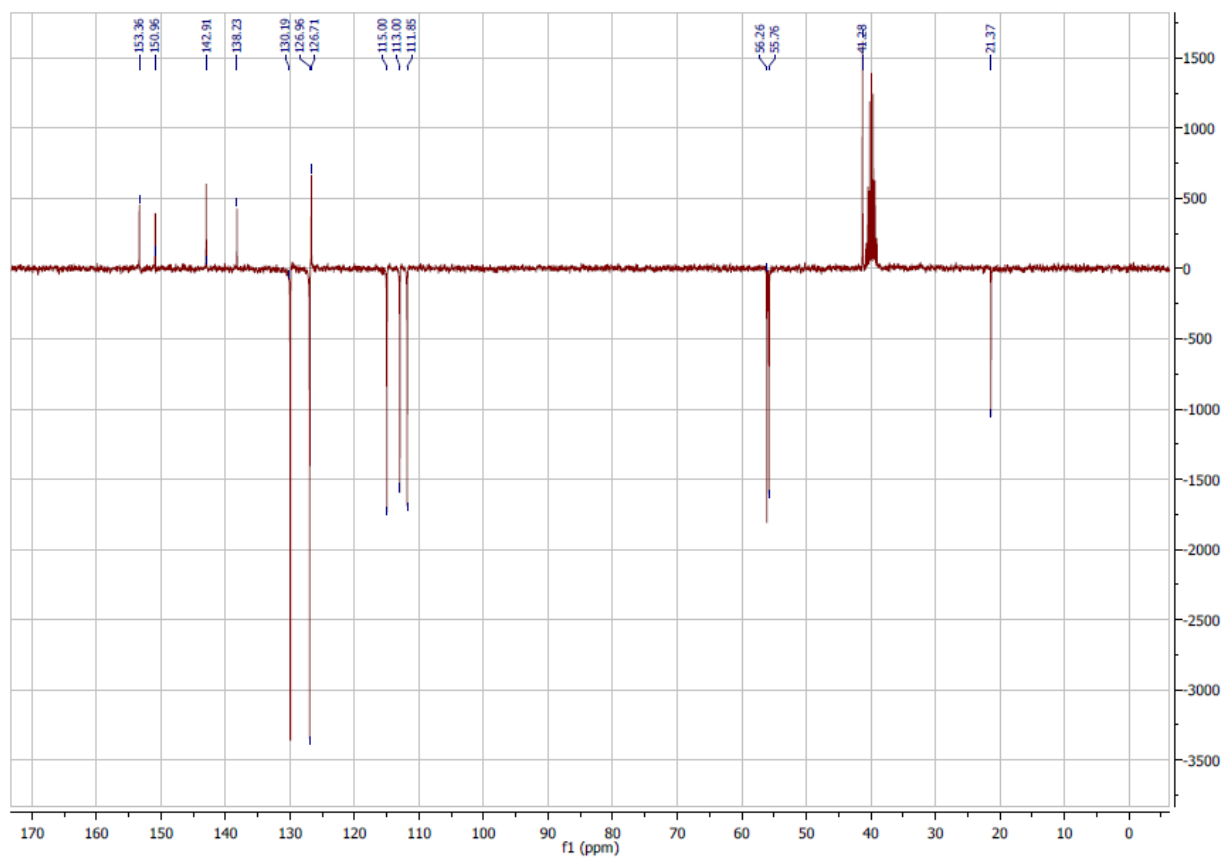

NMR spectra of derivative N-(2,5-Dimethoxybenzyl)-4-nitrobenzenesulfonamide (1G)  
<sup>1</sup>H

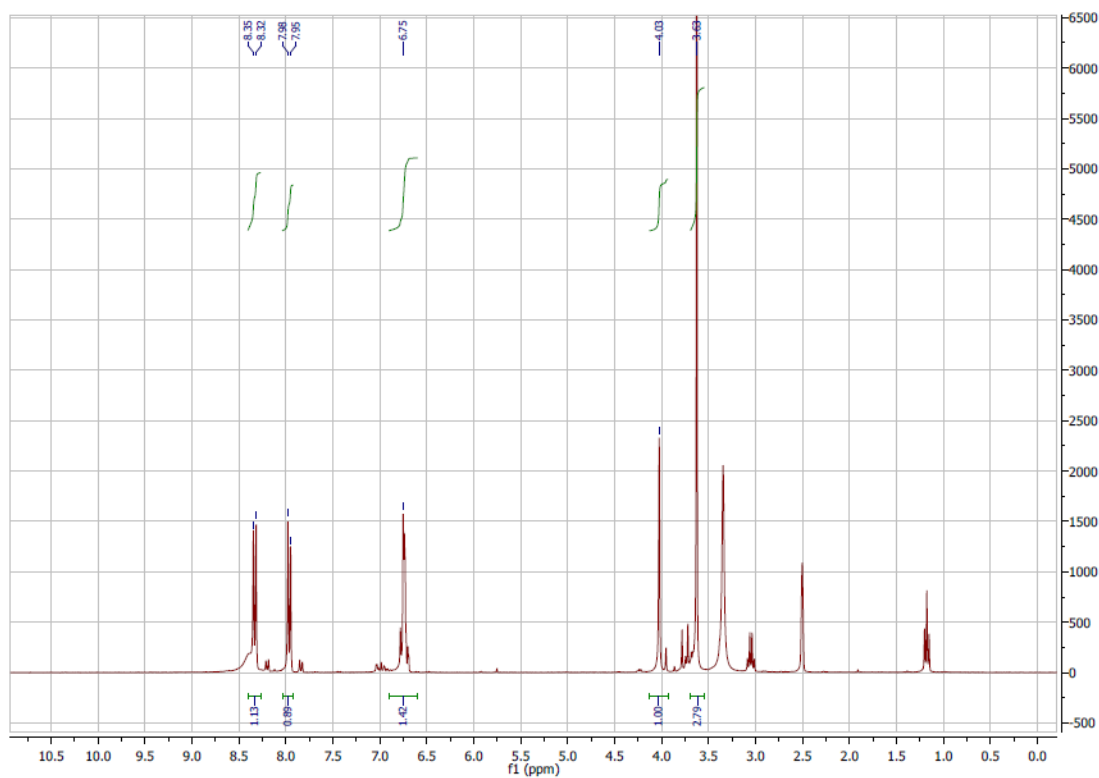

<sup>13</sup>C

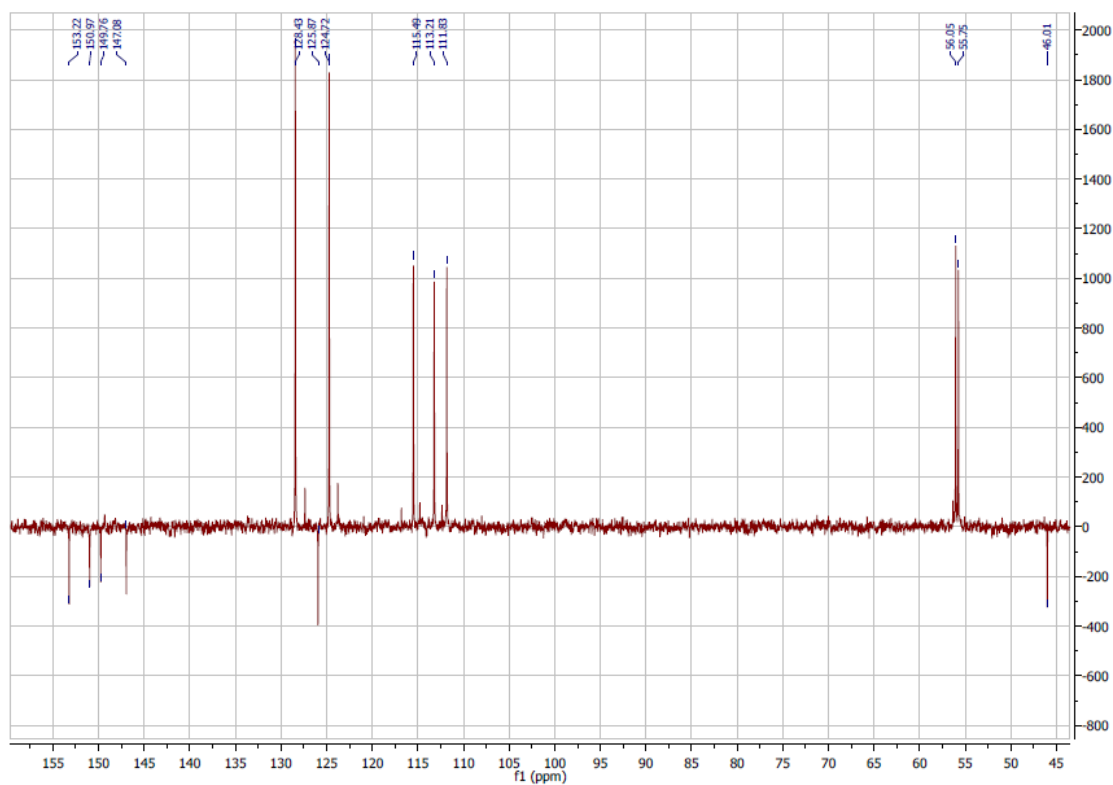

NMR spectra of derivative N-[4-(3,5-dimethylpyrazol-1-yl)phenyl]-4-methylbenzenesulfonamide (2A)  
<sup>1</sup>H

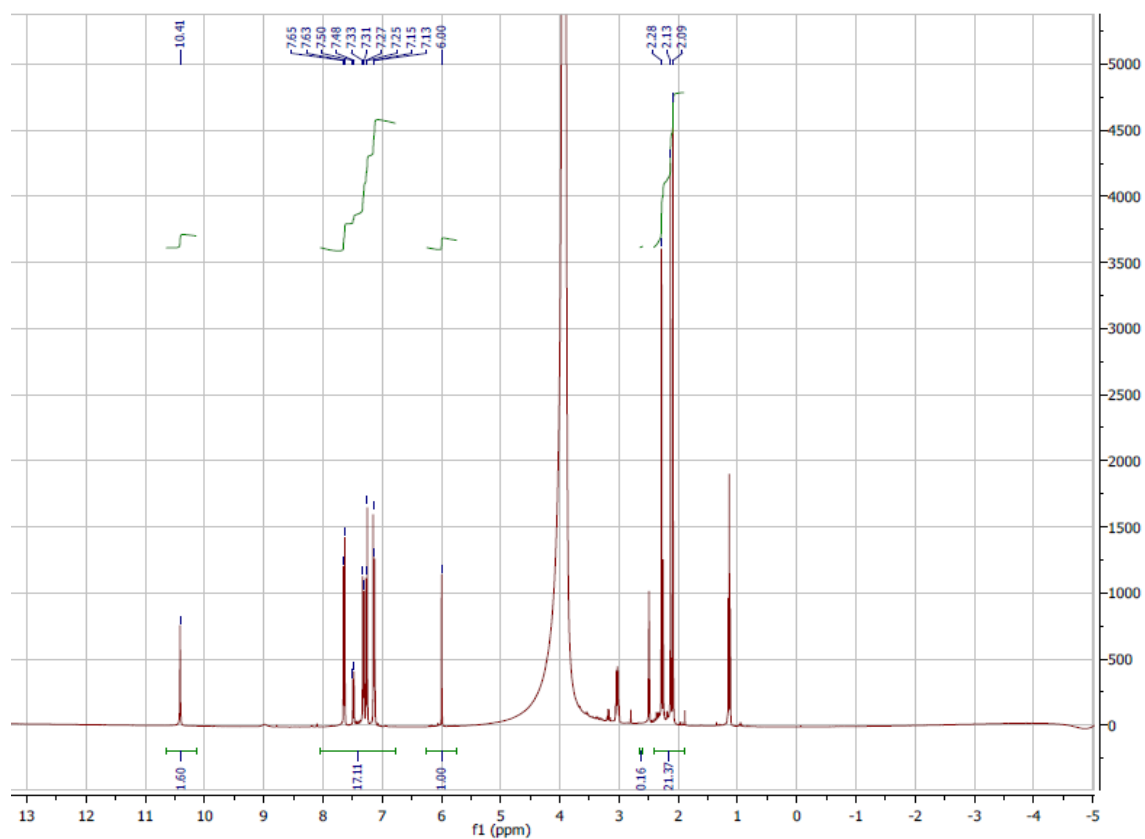

<sup>13</sup>C

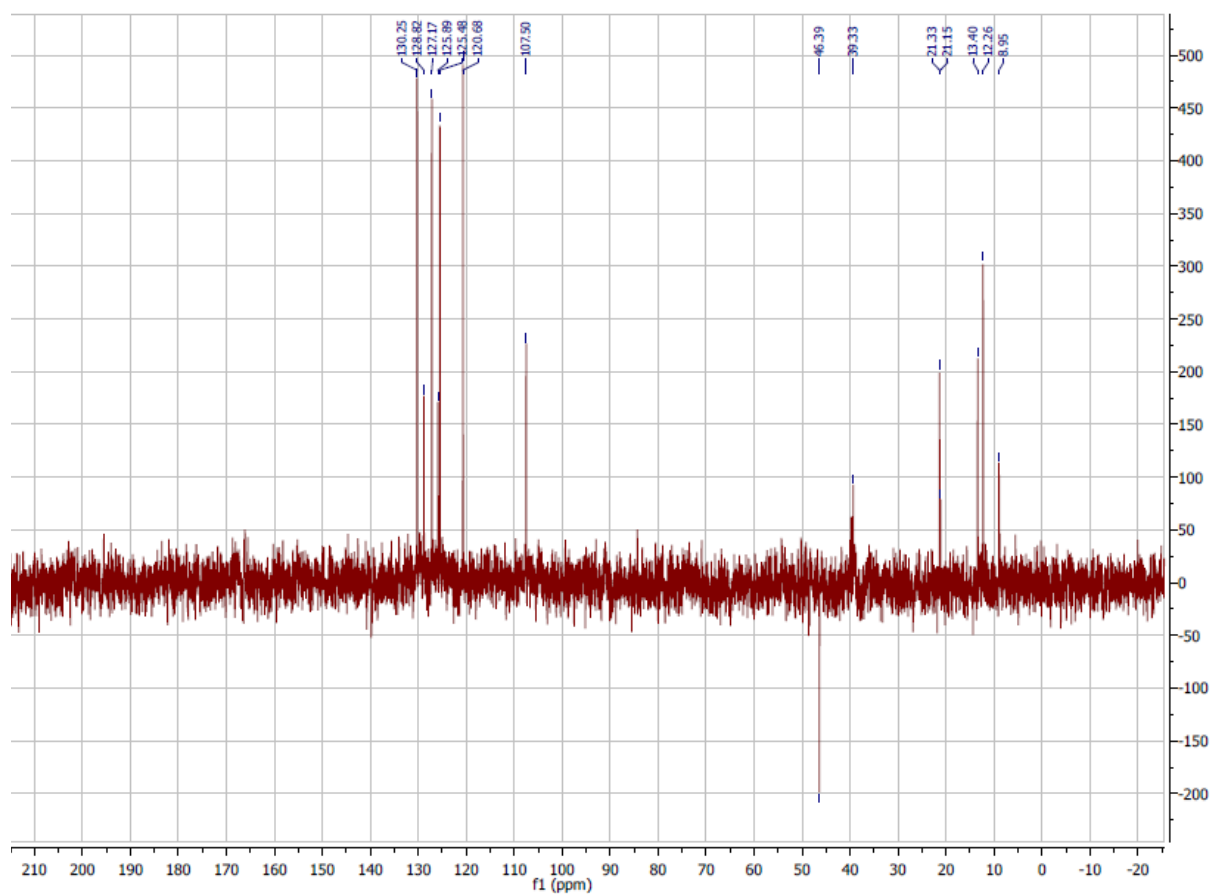

NMR spectra of derivative N-[4-(3,5-dimethylpyrazol-1-yl)phenyl]-4-nitrobenzenesulfonamide (2B)  
<sup>1</sup>H

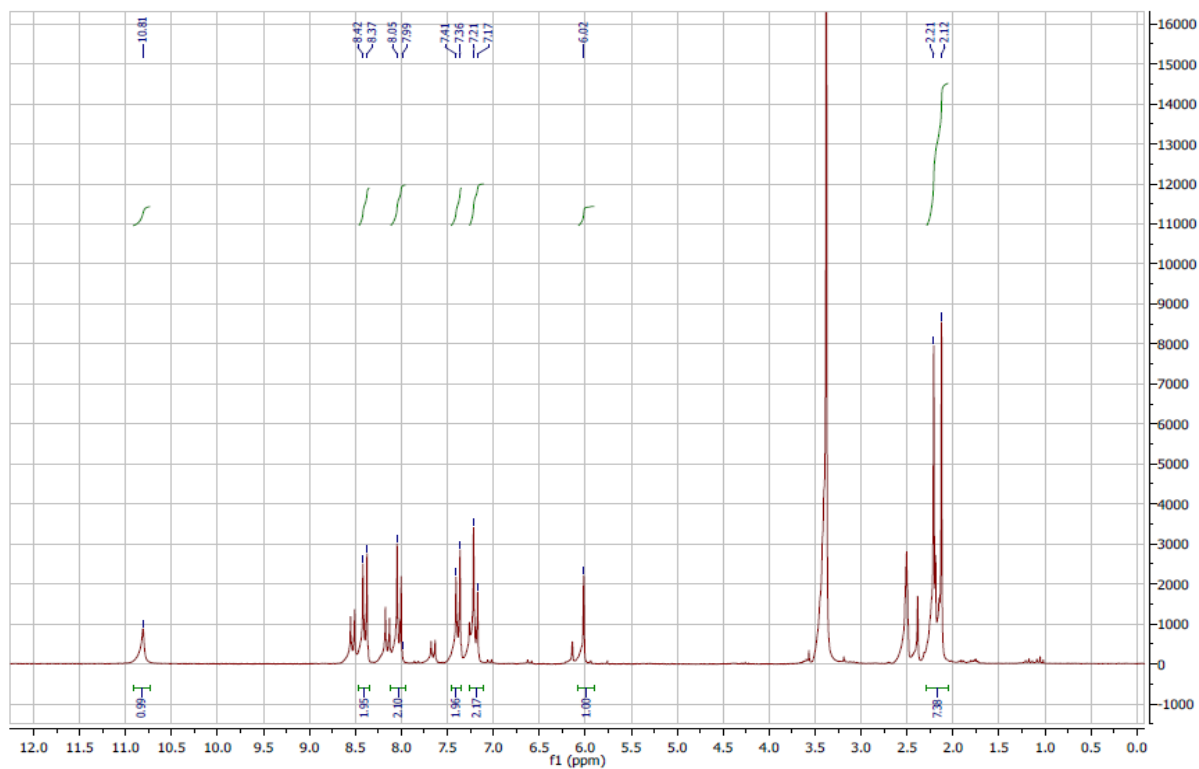

<sup>13</sup>C

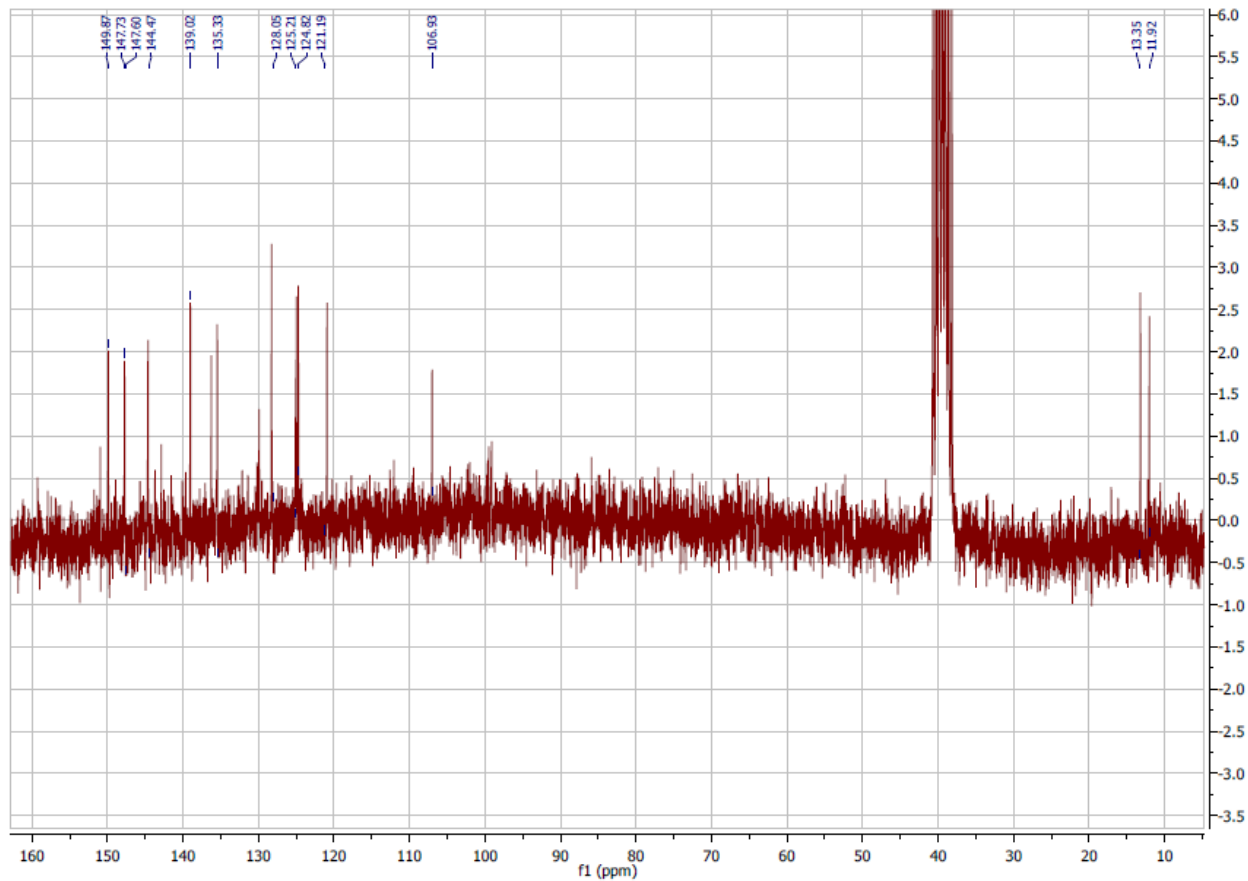

NMR spectra of derivative N-[4-(3,5-dimethylpyrazol-1-yl)phenyl]-4-aminobenzenesulfonamide  
(2C)  
<sup>1</sup>H

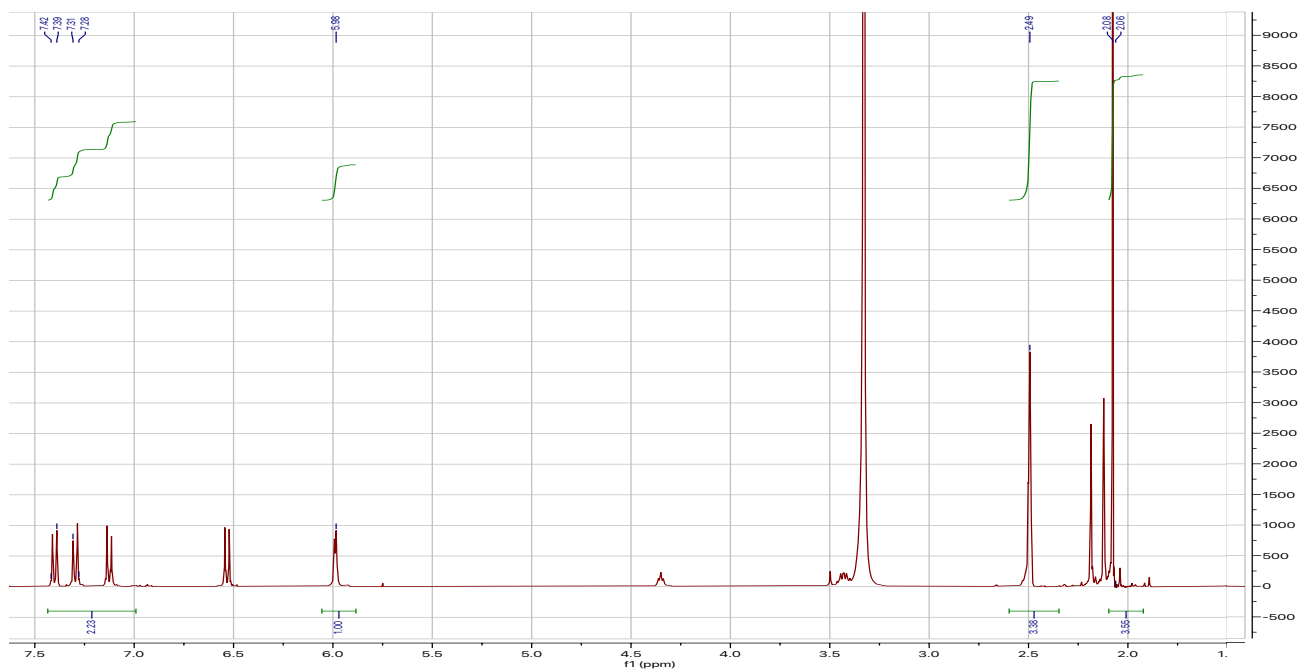

<sup>13</sup>C

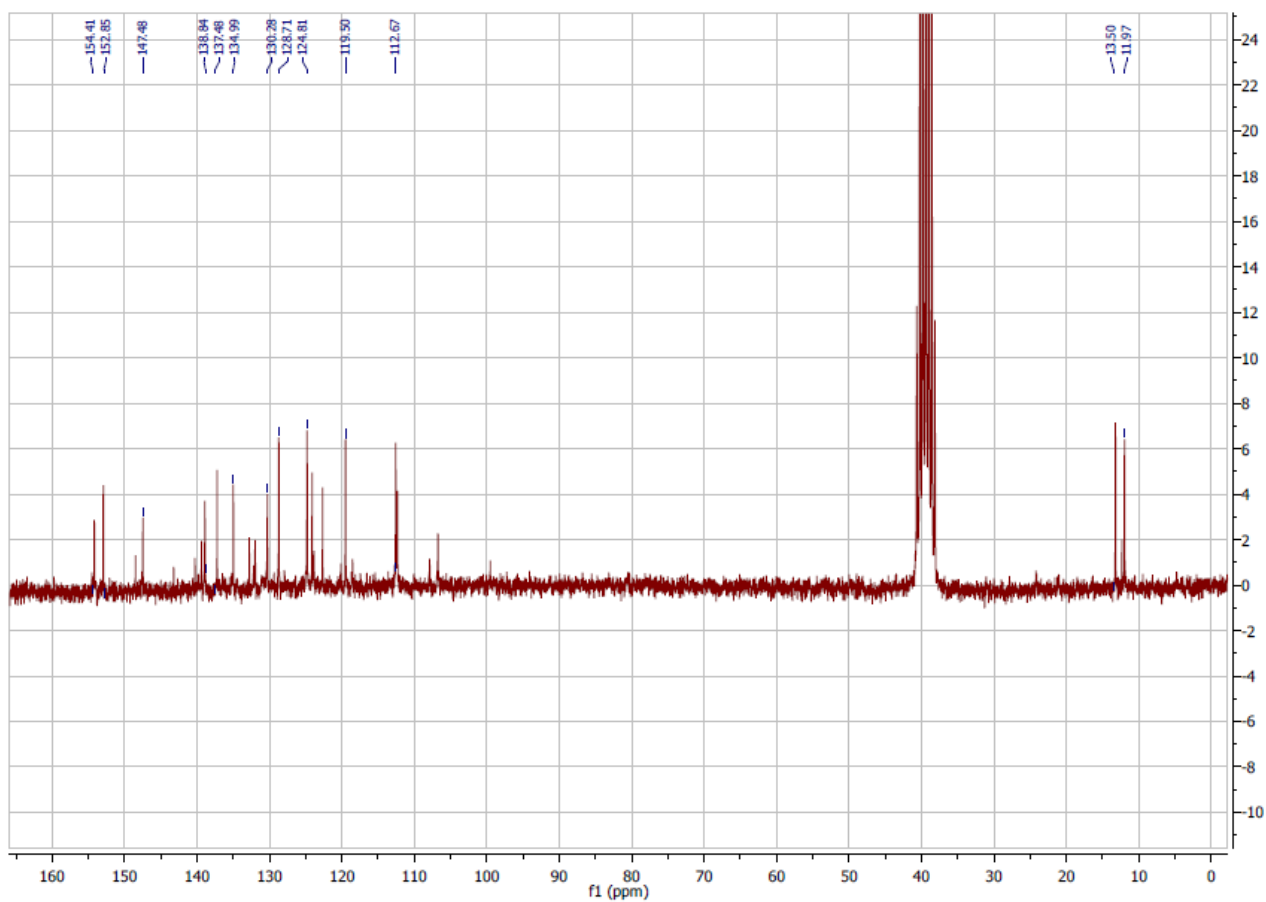

Supplement: s1 [file s1]
